# Supplementary material for: Destratification of a Eutrophic Reservoir in South Korea Using a Novel Convectional Water Circulation System (CWCS)
Source: MDPI journal article supplement (doi:10.3390/w14081282), 2022-04-15
Supplement: s1 [file s1]

Archive with 1 entries (1 files):
- water-1677025-supplementary.pdf
