# Supplementary material for: Destratification of a Eutrophic Reservoir in South Korea Using a Novel Convectional Water Circulation System (CWCS)
Source: MDPI journal article supplement (doi:10.3390/w14081282), 2022-04-15
Supplement: s1 [file s1 › water-1677025-supplementary.pdf]

## Supplementary Material

Table S1. Water depths of each layer in Shingal reservoir

| Water depth (m) | 2016 |     | 2017            |                |      |
|-----------------|------|-----|-----------------|----------------|------|
|                 | A, B | C   | July<br>A, B, C | September<br>A | B, C |
| Surface         | 0    | 0   | 0               | 0              | 0    |
| Epilimnion      | 1.2  | -   | 1               | -              | -    |
| Metalimnion     | 2.5  | 3   | 3               | 2.5            | 3    |
| Hypolimnion     | 5    | 5.3 | 5               | 5              | 5    |

A: the CWCS deployment site

B: 100 m away from A

C: 200 m away from B

Table S2. Water temperature differences at experiment sites and water depths on each data experiment date

| Parameter           |                            | Date   |         |         |         |        |         |         |         |                |                |               |         |
|---------------------|----------------------------|--------|---------|---------|---------|--------|---------|---------|---------|----------------|----------------|---------------|---------|
|                     |                            | 2016   |         |         |         | 2017   |         |         |         |                |                |               |         |
|                     |                            | Sep. 6 | Sep. 12 | Sep. 22 | Sep. 28 | Oct. 6 | Oct. 21 | Jul. 20 | Jul. 27 | Sep. 8 10 a.m. | Sep. 8 12 p.m. | Sep. 8 2 p.m. | Sep. 21 |
| Deployment site (A) | $\Delta T_{(epi. - hypo)}$ | 3.5    | 3.6     | 2.2     | 1.0     | 0.1    | 0.4     | 4.8     | 5.1     | 1.0            | 2.0            | 1.7           | 2.0     |
| Control (B)         |                            | 3.7    | 4.1     | 2.7     | 1.3     | 0.8    | 0.6     | 7.5     | 5.6     | -              | -              | -             | 2.8     |
| Control (C)         | ( $^{\circ}\text{C}$ )     | 4.2    | 4.0     | 2.7     | 3.1     | 2.1    | 1.4     | 8.7     | 5.3     | 1.3            | 2.4            | 3.7           | -       |
| Epilimnion (0 m)    | $\Delta T_{(A - C)}$       | 0.1    | 0.1     | -0.2    | -0.8    | -1.2   | -0.4    | -       | -0.1    | 0.01           | -0.08          | -1.70         | -       |
| Hypolimnion (5 m)   | ( $^{\circ}\text{C}$ )     | 0.8    | 0.5     | 0.3     | 1.3     | 0.8    | 0.6     | 2.2     | 0.1     | 0.32           | 0.38           | 0.31          | -       |

\* Smaller temperature differences represent improved effectiveness of the convectonal water circulation system

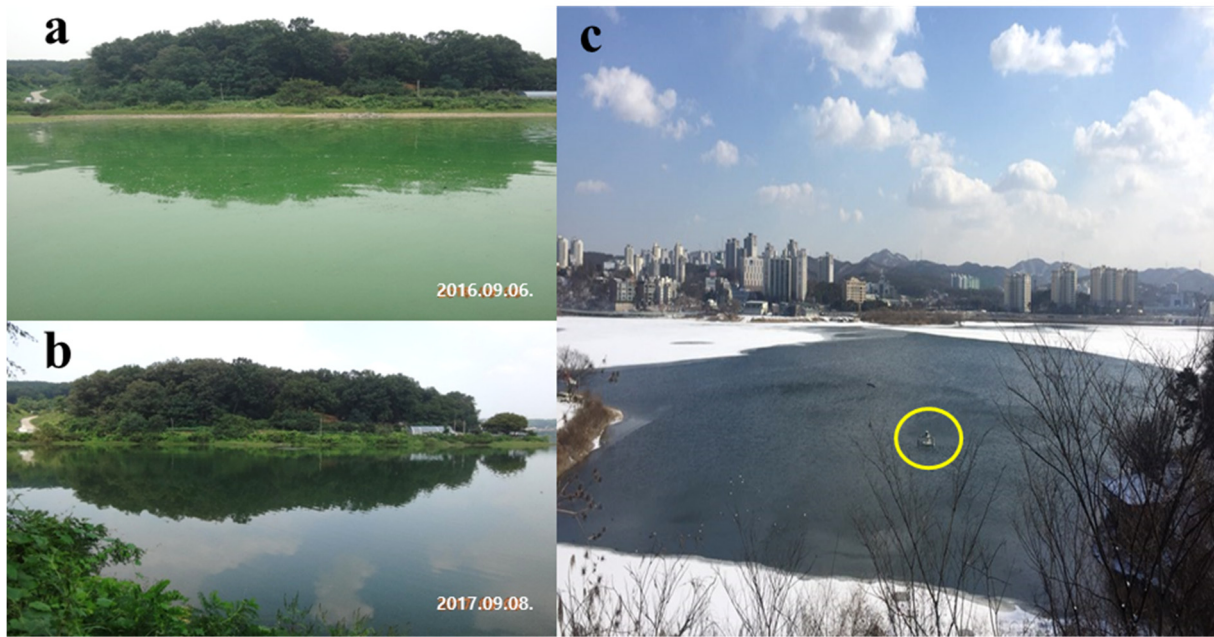

**Figure S1.** Photos taken at the study site, Shingal reservoir, in (a) September 6, 2016, (b) September 8, 2017, and (c) as viewed from the west in December 2017. Yellow circle indicates the CWCS unit in operation.
